# Supplementary material for: Structure of PDE3A-SLFN12 complex reveals requirements for activation of SLFN12 RNase
Source: PubMed Central journal article supplement (PMC8285493; doi:10.1038/s41467-021-24495-w), 2021-07-16
Supplement: 41467_2021_24495_MOESM3_ESM.pdf [file 41467_2021_24495_MOESM3_ESM.pdf]

## Description of Additional Supplementary Files

**Supplementary Data 1: HDX data: Deuterium uptake values of PDE3A<sup>CAT</sup>:BRD9500 and PDE3A<sup>CAT</sup>:BRD9500:SLFN12.**

**Supplementary Data 2: Enrichment scores for mutant alleles in the deep mutational scanning experiment.**

**Supplementary Movie 1: Dynamics observed between PDE3A<sup>CAT</sup> and SLFN12 during data collection.** Movie depicting the middle 80% of the particle movement range distribution along the most significant (representing ~ 30% of the variance) eigenvector of particle alignment changes between the SLFN12 body and the PDE3A<sup>CAT</sup> body. Orientation and color scheme is as shown in Figure 5A.
